# Supplementary material for: IAA Plays an Important Role in Alkaline Stress Tolerance by Modulating Root Development and ROS Detoxifying Systems in Rice Plants
Source: MDPI journal article supplement (doi:10.3390/ijms232314817), 2022-11-26
Supplement: s1 [file s1]

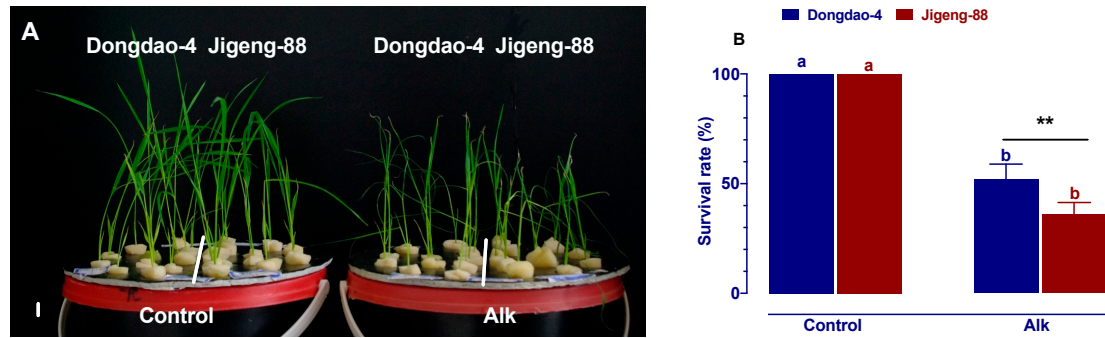

**Figure S1.** Effects of alkaline stress on Dongdao-4 and Jigeng-88 seedlings. (A) Growth performance. (B) Survival rate. One-week-old rice seedlings grown in normal culture solution were transferred to culture solution supplemented with 20 mM  $\text{NaHCO}_3$  and a pH of 8.5 for 2 days. Survival rate was measured after treatment with alkaline stress for one week. Alk=alkaline stress. Bars=10 cm. Data are means $\pm$ SE ( $n\geq 5$ ). Means with different letters are significantly different between control and alkaline stress of the same genotype ( $P<0.05$ ). Asterisks indicate significant differences between different genotypes within the same treatment (\*\* $P<0.01$ ).

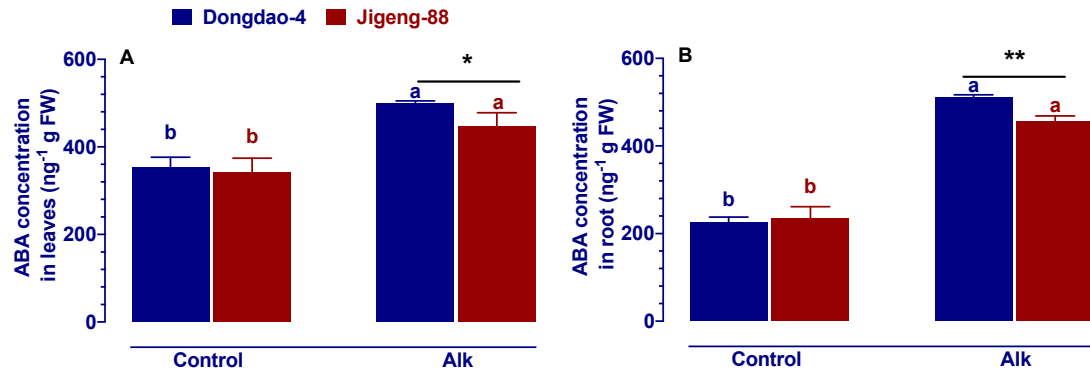

**Figure S2.** ABA concentrations of (A) shoots and (B) roots of Dongdao-4 and Jigeng-88 seedlings grown in normal and saline-alkaline stress conditions. Two-week-old rice seedlings grown in normal culture solution were transferred to culture solution supplemented with 20 mM NaHCO<sub>3</sub> and a pH of 8.5 for 5 days. Alk=alkaline stress. Bars=10 cm. Data are means±SE ( $n \geq 5$ ). Means with different letters are significantly different between control and alkaline stress of the same genotype ( $P < 0.05$ ). Asterisks indicate significant differences between different genotypes within the same treatment (\* $P < 0.05$ , \*\* $P < 0.01$ ).

Table S1. Primers used for quantitative real-time PCR in this study

| <b>Gene</b>     | <b>Forward primer 5' → 3'</b> | <b>Reverse primer 5' → 3'</b> |
|-----------------|-------------------------------|-------------------------------|
| <i>OsYUCCA1</i> | TCATCGGACGCCCTCAACGGGTCGC     | GGCAGAGCAAGATTATCAGTC         |
| <i>OsTAA1</i>   | GTCCTGCCAAATAGGTTCTCA         | TCACGCAGGCACTGATCTAC          |
| <i>OsPIN1</i>   | AGTACAAAGCTTGGGGGGAC          | ATCTCTTGTCAGAATCGGCG          |
| <i>OsGH3.2</i>  | GCTAGACGACACAACGATATATAGCC    | CTGATGCCCTCTGCCTTAAACAC       |
| <i>OsGH3.8</i>  | GTCCGAATAGTCGGTCAAATCC        | TGCCACTAACTGACAGAGTTGACAG     |
| <i>Actin</i>    | ACCACAGGTATTGTGTTGGACTC       | AGAGCATATCCTTCATAGATGGG       |
